# Supplementary material for: Ferritin and LDH as Predictors of Mortality in COVID-19 Infection, Bosnia and Herzegovina Single-center Study
Source: Research Square preprint supplement (doi:10.21203/rs.3.rs-143696/v1), 2021-01-14
Supplement: Supplementary file 1 [file 6b5141d213f72263b7009cf8.pdf]

Tabel 1. Other biochemical markers observed

|               | <u>Mean</u> | <u>SD</u> | <u>Maximum</u> | <u>Minimum</u> |
|---------------|-------------|-----------|----------------|----------------|
| ALT           | 85.66       | 315.31    | 3648.00        | 9.00           |
| AST           | 92.40       | 398.15    | 4635.00        | 13.00          |
| CRP           | 111.98      | 108.36    | 458.00         | .20            |
| Urea          | 10.29       | 8.02      | 49.40          | 1.10           |
| Creatinin     | 126.78      | 94.94     | 682.00         | 45.00          |
| D-dimer       | 2.79        | 1.71      | 5.00           | .20            |
| O2 saturation | 85.86%      | 8.77      | 96.60          | 59.10          |

Notes:

Tabel 2. Statistical analysis of LDH, Ferritin, and LOH

|          | n                  | Mean (SD)        | p-value  | OR (CI95%)           |
|----------|--------------------|------------------|----------|----------------------|
| Age      | 137                | 61.91 ± 16.33243 |          |                      |
| Outcome  | 137<br>(68 L; 69D) |                  |          |                      |
| LDH >350 | 78                 | 238.91 ± 70.48   | p<0.001  | 5.560 (2.480-12.468; |
| LDH <350 | 59                 | 552.02 ± 283.90  | (MANOVA) | p<0.001)             |

|               |     |                     |                     |                                            |
|---------------|-----|---------------------|---------------------|--------------------------------------------|
| Feritin >1500 | 25  | 2254.02±<br>1161.32 | p<0.001<br>(MANOVA) | 11.525 (CI95%<br>2.452-54.162;<br>P=0.002) |
| Feritin <1500 | 112 | 545.0± 380.88       |                     |                                            |

LOH  $7.76 \pm 5.029$

---

Note: L- live; D-deceased
